# Supplementary material for: Dry reforming of HCs (methane, ethane, and propane) over a 40Ni0.75(Ce1−xFex)0.25/Al2O3 catalyst: a comparative study
Source: Royal Society of Chemistry journal article supplement (doi:10.1039/d4se00467a), 2024-01-01
Supplement: d4se00467a1.pdf [file d4se00467a1.pdf]

## Dry Reforming of HC<sub>s</sub> (Methane, Ethane, and Propane) over a 40Ni<sub>0.75</sub>(Ce<sub>1-x</sub>Fe<sub>x</sub>)<sub>0.25</sub>/Al<sub>2</sub>O<sub>3</sub> Catalyst: A comparative study

Akanksha Singh Rajput, Taraknath Das\*

*Heterogeneous Catalysis Laboratory (Reaction Engineering)*

*Department of Chemical Engineering, Indian Institute of Technology Roorkee, 247667, Haridwar, Uttara Khand (UK), India.*

\*Email: taraknath.das@ch.iitr.ac.in or tarak3581@gmail.com

### Supporting information:

**Table S1:** The H<sub>2</sub> consumption, CO<sub>2</sub> desorption, and Hydrogen Chemisorption analysis of the synthesized catalysts.

| Catalyst                                                                                                      | H <sub>2</sub> –consumption<br>(ml/g <sub>cat</sub> ) | CO <sub>2</sub> –desorption<br>(ml/g <sub>cat</sub> ) | H <sub>2</sub> -Chemisorption analysis |                                                                                                     |                                       |
|---------------------------------------------------------------------------------------------------------------|-------------------------------------------------------|-------------------------------------------------------|----------------------------------------|-----------------------------------------------------------------------------------------------------|---------------------------------------|
|                                                                                                               |                                                       |                                                       | Metal Dispersion<br>(PD) (%)           | Metallic Surface<br>Area per gram of<br>Metal (S <sub>metallic</sub> )<br>(m <sup>2</sup> /g-metal) | Active Particle<br>Size (APS)<br>(nm) |
| 40Ni <sub>0.75</sub> Ce <sub>0.25</sub> /Al <sub>2</sub> O <sub>3</sub>                                       | 216.8                                                 | 0.353                                                 | 24.2                                   | 161.2                                                                                               | 12.9                                  |
| 40Ni <sub>0.75</sub> (Ce <sub>0.75</sub> Fe <sub>0.25</sub> ) <sub>0.25</sub> /Al <sub>2</sub> O <sub>3</sub> | 227.4                                                 | 0.565                                                 | 24.5                                   | 163.2                                                                                               | 11.5                                  |
| 40Ni <sub>0.75</sub> (Ce <sub>0.5</sub> Fe <sub>0.5</sub> ) <sub>0.25</sub> /Al <sub>2</sub> O <sub>3</sub>   | 183.1                                                 | 0.301                                                 | 23.7                                   | 158.3                                                                                               | 12.8                                  |
| 40Ni <sub>0.75</sub> (Ce <sub>0.25</sub> Fe <sub>0.75</sub> ) <sub>0.25</sub> /Al <sub>2</sub> O <sub>3</sub> | 170.4                                                 | 0.223                                                 | 23.2                                   | 154.5                                                                                               | 13.5                                  |
| 40Ni <sub>0.75</sub> Fe <sub>0.25</sub> /Al <sub>2</sub> O <sub>3</sub>                                       | 158.8                                                 | 0.175                                                 | 23                                     | 153.6                                                                                               | 12.5                                  |

**Table S2:** The % Yield and % conversion of various products during the HC dry reforming reaction, all the reaction performed on 600 °C reaction temperature and 1 atm pressure. Total reactant flow rate was set at 70 ml/min (HC:CO<sub>2</sub>:N<sub>2</sub> = 1:1:5).

| Catalyst                                                                                                      | Reactants                                       | % Yield of      |                |    | % Conversion of |                 | H <sub>2</sub> :CO ratio |
|---------------------------------------------------------------------------------------------------------------|-------------------------------------------------|-----------------|----------------|----|-----------------|-----------------|--------------------------|
|                                                                                                               |                                                 | CH <sub>4</sub> | H <sub>2</sub> | CO | HC              | CO <sub>2</sub> |                          |
| 40Ni <sub>0.75</sub> Ce <sub>0.25</sub> /Al <sub>2</sub> O <sub>3</sub>                                       | CH <sub>4</sub> + CO <sub>2</sub>               | -               | 60             | 67 | 62              | 69              | 0.90                     |
| 40Ni <sub>0.75</sub> (Ce <sub>0.75</sub> Fe <sub>0.25</sub> ) <sub>0.25</sub> /Al <sub>2</sub> O <sub>3</sub> |                                                 | -               | 66             | 74 | 68              | 76              | 0.91                     |
| 40Ni <sub>0.75</sub> (Ce <sub>0.5</sub> Fe <sub>0.5</sub> ) <sub>0.25</sub> /Al <sub>2</sub> O <sub>3</sub>   |                                                 | -               | 59             | 71 | 61              | 74              | 0.94                     |
| 40Ni <sub>0.75</sub> (Ce <sub>0.25</sub> Fe <sub>0.75</sub> ) <sub>0.25</sub> /Al <sub>2</sub> O <sub>3</sub> |                                                 | -               | 56             | 68 | 58              | 70              | 0.93                     |
| 40Ni <sub>0.75</sub> Fe <sub>0.25</sub> /Al <sub>2</sub> O <sub>3</sub>                                       |                                                 | -               | 52             | 67 | 54              | 69              | 0.90                     |
| 40Ni <sub>0.75</sub> Ce <sub>0.25</sub> /Al <sub>2</sub> O <sub>3</sub>                                       | C <sub>2</sub> H <sub>6</sub> + CO <sub>2</sub> | 12              | 69             | 76 | 86              | 81              | 1.3                      |
| 40Ni <sub>0.75</sub> (Ce <sub>0.75</sub> Fe <sub>0.25</sub> ) <sub>0.25</sub> /Al <sub>2</sub> O <sub>3</sub> |                                                 | 16              | 73             | 77 | 91              | 85              | 1.3                      |
| 40Ni <sub>0.75</sub> (Ce <sub>0.5</sub> Fe <sub>0.5</sub> ) <sub>0.25</sub> /Al <sub>2</sub> O <sub>3</sub>   |                                                 | 15              | 68             | 75 | 90              | 83              | 1.18                     |
| 40Ni <sub>0.75</sub> (Ce <sub>0.25</sub> Fe <sub>0.75</sub> ) <sub>0.25</sub> /Al <sub>2</sub> O <sub>3</sub> |                                                 | 14              | 67             | 74 | 89              | 79              | 1.31                     |
| 40Ni <sub>0.75</sub> Fe <sub>0.25</sub> /Al <sub>2</sub> O <sub>3</sub>                                       |                                                 | 13              | 67             | 72 | 84              | 77              | 1.4                      |
| 40Ni <sub>0.75</sub> Ce <sub>0.25</sub> /Al <sub>2</sub> O <sub>3</sub>                                       | C <sub>3</sub> H <sub>8</sub> + CO <sub>2</sub> | 21              | 70             | 81 | 88              | 86              | 1.3                      |
| 40Ni <sub>0.75</sub> (Ce <sub>0.75</sub> Fe <sub>0.25</sub> ) <sub>0.25</sub> /Al <sub>2</sub> O <sub>3</sub> |                                                 | 22              | 80             | 84 | 90              | 88              | 1.1                      |
| 40Ni <sub>0.75</sub> (Ce <sub>0.5</sub> Fe <sub>0.5</sub> ) <sub>0.25</sub> /Al <sub>2</sub> O <sub>3</sub>   |                                                 | 21              | 69             | 80 | 88              | 85              | 1.12                     |
| 40Ni <sub>0.75</sub> (Ce <sub>0.25</sub> Fe <sub>0.75</sub> ) <sub>0.25</sub> /Al <sub>2</sub> O <sub>3</sub> |                                                 | 20              | 69             | 77 | 87              | 84              | 1.12                     |
| 40Ni <sub>0.75</sub> Fe <sub>0.25</sub> /Al <sub>2</sub> O <sub>3</sub>                                       |                                                 | 19              | 70             | 76 | 86              | 83              | 1.13                     |

**Table S3:** The % Yield and % conversion of various products during the HC dry reforming reaction, at different reaction temperature and 1 atm pressure. Total reactant flow rate was maintained at 70 ml/min (HC:CO<sub>2</sub>:N<sub>2</sub> = 1:1:5) over the catalyst 40Ni<sub>0.75</sub>(Ce<sub>0.75</sub>Fe<sub>0.25</sub>)<sub>0.25</sub>/Al<sub>2</sub>O<sub>3</sub>.

| Reactants                                       | Reaction Temperature (°C) | % Yield of      |                               |                               |                |    | % Conversion of |                 | H <sub>2</sub> :CO ratio |
|-------------------------------------------------|---------------------------|-----------------|-------------------------------|-------------------------------|----------------|----|-----------------|-----------------|--------------------------|
|                                                 |                           | CH <sub>4</sub> | C <sub>2</sub> H <sub>4</sub> | C <sub>3</sub> H <sub>6</sub> | H <sub>2</sub> | CO | HC              | CO <sub>2</sub> |                          |
| CH <sub>4</sub> & CO <sub>2</sub>               | 500                       | -               | -                             | -                             | -              | -  | -               | -               | -                        |
|                                                 | 550                       | -               | -                             | -                             | -              | -  | -               | -               | -                        |
|                                                 | 600                       | -               | -                             | -                             | 66             | 74 | 67              | 75              | 0.93                     |
|                                                 | 650                       | -               | -                             | -                             | 68             | 61 | 81              | 86              | 0.91                     |
|                                                 | 700                       | -               | -                             | -                             | 77             | 59 | 93              | 100             | 0.95                     |
|                                                 | 750                       | -               | -                             | -                             | 87             | 57 | 96              | 100             | 1                        |
|                                                 | 800                       | -               | -                             | -                             | 88             | 54 | 98              | 100             | 1                        |
| C <sub>2</sub> H <sub>6</sub> & CO <sub>2</sub> | 500                       | 30              | 44                            | -                             | 32             | 40 | 78              | 65              | 1.47                     |
|                                                 | 550                       | 29              | 42                            | -                             | 43             | 44 | 87              | 72              | 1.38                     |
|                                                 | 600                       | 16              | -                             | -                             | 73             | 77 | 91              | 85              | 1.3                      |
|                                                 | 650                       | 6               | -                             | -                             | 82             | 80 | 96              | 90              | 1.35                     |
|                                                 | 700                       | 4               | -                             | -                             | 87             | 82 | 100             | 100             | 1.34                     |
|                                                 | 750                       | 2               | -                             | -                             | 86             | 83 | 100             | 100             | 1.25                     |
|                                                 | 800                       | 6               | 38                            | -                             | 86             | 75 | 99              | 100             | 1.04                     |
| C <sub>3</sub> H <sub>8</sub> & CO <sub>2</sub> | 500                       | 61              | -                             | -                             | 54             | 50 | 88              | 77              | 1.1                      |
|                                                 | 550                       | 51              | -                             | -                             | 68             | 62 | 89              | 80              | 1.19                     |
|                                                 | 600                       | 22              | -                             | -                             | 80             | 84 | 90              | 88              | 1.1                      |
|                                                 | 650                       | 13              | -                             | -                             | 84             | 85 | 91              | 88              | 1.1                      |
|                                                 | 700                       | 11              | -                             | 3                             | 85             | 82 | 93              | 89              | 0.99                     |
|                                                 | 750                       | 16              | -                             | 14                            | 87             | 89 | 94              | 99              | 0.93                     |
|                                                 | 800                       | 36              | -                             | 26                            | 94             | 79 | 99              | 100             | 0.68                     |

**Table S4:** The % Yield and % conversion of various products during the HC dry reforming reaction, where HC (10 ml/min) reactant and N<sub>2</sub> (50 ml/min) flow rate is fixed and CO<sub>2</sub> flow rate varies (10, 15, 20, 25, 30 ml/min) over the catalyst 40Ni<sub>0.75</sub>(Ce<sub>0.75</sub>Fe<sub>0.25</sub>)<sub>0.25</sub>/Al<sub>2</sub>O<sub>3</sub>.

| Reactant and reaction temperature                         | HC:CO <sub>2</sub> ratio | % Yield of      |                               |                               |                |    | % Conversion of |                 | H <sub>2</sub> :CO ratio |
|-----------------------------------------------------------|--------------------------|-----------------|-------------------------------|-------------------------------|----------------|----|-----------------|-----------------|--------------------------|
|                                                           |                          | CH <sub>4</sub> | C <sub>2</sub> H <sub>4</sub> | C <sub>3</sub> H <sub>6</sub> | H <sub>2</sub> | CO | HC              | CO <sub>2</sub> |                          |
| CH <sub>4</sub> & CO <sub>2</sub><br>700 °C               | 1:1                      | -               | -                             | -                             | 77             | 58 | 94              | 100             | 0.95                     |
|                                                           | 1:1.5                    | -               | -                             | -                             | 85             | 72 | 96              | 86              | 0.8                      |
|                                                           | 1:2                      | -               | -                             | -                             | 78             | 66 | 99              | 76              | 0.73                     |
|                                                           | 1:2.5                    | -               | -                             | -                             | 79             | 65 | 100             | 68              | 0.68                     |
|                                                           | 1:3                      | -               | -                             | -                             | 76             | 64 | 100             | 56              | 0.60                     |
| C <sub>2</sub> H <sub>6</sub> & CO <sub>2</sub><br>650 °C | 1:1                      | 6               | 0                             | -                             | 82             | 80 | 95              | 90              | 1.35                     |
|                                                           | 1:1.5                    | 8               | 0                             | -                             | 73             | 78 | 97              | 90              | 1.25                     |
|                                                           | 1:2                      | 6               | 27                            | -                             | 45             | 61 | 95              | 85              | 1.07                     |
|                                                           | 1:2.5                    | 4               | 22                            | -                             | 26             | 47 | 90              | 76              | 0.91                     |
|                                                           | 1:3                      | 11              | 32                            | -                             | 41             | 53 | 82              | 71              | 0.76                     |
| C <sub>3</sub> H <sub>8</sub> & CO <sub>2</sub><br>600 °C | 1:1                      | 22              | -                             | -                             | 80             | 84 | 90              | 88              | 1.1                      |
|                                                           | 1:1.5                    | 33              | -                             | -                             | 79             | 71 | 99              | 90              | 0.89                     |
|                                                           | 1:2                      | 29              | -                             | -                             | 78             | 67 | 95              | 75              | 0.80                     |
|                                                           | 1:2.5                    | 18              | -                             | -                             | 75             | 60 | 83              | 68              | 0.82                     |
|                                                           | 1:3                      | 17              | -                             | -                             | 72             | 60 | 69              | 57              | 0.75                     |

**Table-S5:** The detailed percent conversion of various catalysts (reported) and the synthesized catalysts (present study).

| Catalysts                                             | Reaction | Temperature (°C) | % Conv. of HC | % Conv. of CO <sub>2</sub> | References |
|-------------------------------------------------------|----------|------------------|---------------|----------------------------|------------|
| 15Ni/Al <sub>2</sub> O <sub>3</sub> -SiO <sub>2</sub> | DRM      | 700              | 74            | 80                         | 8          |

|                                                      |     |     |      |      |    |
|------------------------------------------------------|-----|-----|------|------|----|
| RuO <sub>2</sub> +NiO                                | DRM | 650 | 49.9 | 61.1 | 9  |
|                                                      |     | 800 | 87.9 | 100  |    |
| Ni-Fe/La-Al                                          | DRM | 800 | 92   | 98   | 16 |
| 5Ni/0.3Mg-HAP                                        | DRM | 700 | 75   | 78   | 21 |
| Ni/La-Al <sub>2</sub> O <sub>3</sub>                 | DRE | 650 | 75   | 63   | 3  |
| NdFe <sub>0.7</sub> Ni <sub>0.3</sub> O <sub>3</sub> | DRE | 600 | 33   | 44   | 10 |
| FeNi/Ce-Al <sub>0.5</sub>                            | DRE | 600 | 17   | 41   | 13 |
| LaFe <sub>0.9</sub> Ni <sub>0.1</sub> O <sub>3</sub> | DRE | 600 | 21.4 | 49.7 | 19 |
| NiO(25)-MgO                                          | DRP | 600 | 40   | 43   | 14 |
|                                                      |     | 650 | 45   | 62   |    |
|                                                      |     | 700 | 80   | 85   |    |
|                                                      |     | 800 | 100  | 100  |    |
| A-LCO                                                | DRP | 550 | 19   | 35   | 15 |
| 3wt.%La <sub>2</sub> O <sub>3</sub>                  | DRP | 750 | 70   | 15   | 20 |
| NiO-CeO <sub>2</sub> /Al-F                           | DRP | 650 | 64   | 46   | 31 |
|                                                      |     | 700 | 100  | 75   |    |
|                                                      |     | 750 | 100  | 90   |    |

|                                                                         |     |     |    |     |               |
|-------------------------------------------------------------------------|-----|-----|----|-----|---------------|
| 40Ni <sub>0.75</sub> Ce <sub>0.25</sub> /Al <sub>2</sub> O <sub>3</sub> | DRM | 700 | 93 | 100 | Present study |
|                                                                         | DRE | 650 | 96 | 90  |               |
|                                                                         | DRP | 600 | 90 | 88  |               |

**S.1.** The % conversion, % yield, deactivation factor, and the H<sub>2</sub>:CO ratio were calculated for the DRM, DRE, and DRP reactions.

**a) DRM reaction:**

$$\% X_{CH_4} = \frac{C_{CH_4 (in)} - C_{CH_4 (out)}}{C_{CH_4 (in)}} * 100$$

$$\% X_{CO_2} = \frac{C_{CO_2 (in)} - C_{CO_2 (out)}}{C_{CO_2 (in)}} * 100$$

$$\% Y_{H_2} = \frac{\text{mole of } H_2 (out)}{2 * \text{mole of } CH_4 (in)} * 100$$

$$\% Y_{CO} = \frac{\text{mole of } CO (out)}{\text{mole of } CH_4 (in) + \text{mole of } CO_2 (in)} * 100$$

$$\frac{H_2}{CO} = \frac{\text{mole of } H_2 \text{ produced}}{\text{mole of } CO \text{ produced}}$$

$$DF = \frac{\text{Final HC conversion} - \text{Initial HC conversion}}{\text{Initial HC conversion}}$$

DF- Deactivation Factor

**b) DRE reaction:**

$$\% X_{C_2H_6} = \frac{C_{C_2H_6(in)} - C_{C_2H_6(out)}}{C_{C_2H_6(in)}} * 100$$

$$\% X_{CO_2} = \frac{C_{CO_2(in)} - C_{CO_2(out)}}{C_{CO_2(in)}} * 100$$

$$\% Y_{H_2} = \frac{\text{mole of } H_2 \text{ (out)}}{3 * \text{mole of } C_2H_6 \text{ (in)}} * 100$$

$$\% Y_{CO} = \frac{\text{mole of } CO \text{ (out)}}{\text{mole of } C_2H_6 \text{ (in)} + \text{mole of } CO_2 \text{ (in)}} * 100$$

$$\% Y_{CH_4} = \frac{\text{mole of } CH_4 \text{ (out)}}{2 * \text{mole of } C_2H_6 \text{ (in)}} * 100$$

$$\% Y_{C_2H_4} = \frac{\text{mole of } C_2H_4 \text{ (out)}}{\text{mole of } C_2H_6 \text{ (in)} + \text{mole of } CO_2 \text{ (in)}} * 100$$

$$\frac{H_2}{CO} = \frac{\text{mole of } H_2 \text{ produced}}{\text{mole of } CO \text{ produced}}$$

c) **DRP reaction:**

$$\% X_{C_3H_8} = \frac{C_{C_3H_8(in)} - C_{C_3H_8(out)}}{C_{C_3H_8(in)}} * 100$$

$$\% X_{CO_2} = \frac{C_{CO_2(in)} - C_{CO_2(out)}}{C_{CO_2(in)}} * 100$$

$$\% Y_{H_2} = \frac{\text{mole of } H_2 \text{ (out)}}{4 * \text{mole of } C_3H_8 \text{ (in)}} * 100$$

$$\% Y_{CO} = \frac{\text{mole of } CO_{(out)}}{\text{mole of } C_3H_8_{(in)} + \text{mole of } CO_2_{(in)}} * 100$$

$$\% Y_{CH_4} = \frac{\text{mole of } CH_4_{(out)}}{3 * \text{mole of } C_3H_8_{(in)}} * 100$$

$$\% Y_{C_3H_6} = \frac{\text{mole of } C_3H_8_{(out)}}{\text{mole of } C_3H_8_{(in)} + \text{mole of } CO_2_{(in)}} * 100$$

$$\frac{H_2}{CO} = \frac{\text{mole of } H_2 \text{ produced}}{\text{mole of } CO \text{ produced}}$$
